# Supplementary material for: Solution-phase, template-free synthesis of PbI2 and MAPbI3 nano/microtubes for high-sensitivity photodetectors
Source: Royal Society of Chemistry journal article supplement (doi:10.1039/c9nr00452a), 2019-01-01
Supplement: c9nr00452a1.pdf [file c9nr00452a1.pdf]

## Supporting Information

### **Solution-phase, template-free synthesis of $\text{PbI}_2$ and $\text{MAPbI}_3$ nano/microtubes for high-sensitivity photodetectors**

Perumal veeramalai Chandrasekar<sup>a</sup>, Shengyi Yang<sup>a,b\*</sup>, Jinming Hu<sup>a</sup>, Muhammad Sulaman<sup>a,b</sup>, Yuansheng Shi<sup>a</sup>, Muhammad Imran Saleem<sup>a</sup>, Yi Tang<sup>b</sup>, Yurong Jiang<sup>b</sup>, Bingsou Zou<sup>a</sup>

<sup>a</sup>Beijing Key Lab of Nanophotonics and Ultrafine Optoelectronic Systems, School of Physics, Beijing Institute of Technology, Beijing 100081; Key Lab of Advanced Optoelectronic Quantum Design and Measurement, Ministry of Education, Beijing Institute of Technology, Beijing 100081

<sup>b</sup>Beijing Key Laboratory for Precision Optoelectronic Measurement Instrument and Technology, School of Optics and Photonics, Beijing Institute of Technology, Beijing 100081, P. R. China

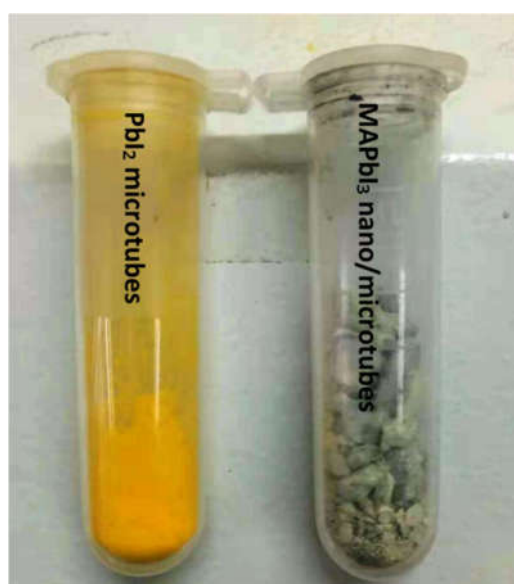

**Figure S1** Photographic image of as-synthesized  $\text{PbI}_2$  microtubes and  $\text{MAPbI}_3$  nano/microtubes. The as-synthesized samples are dried in vacuum oven at 40 °C.

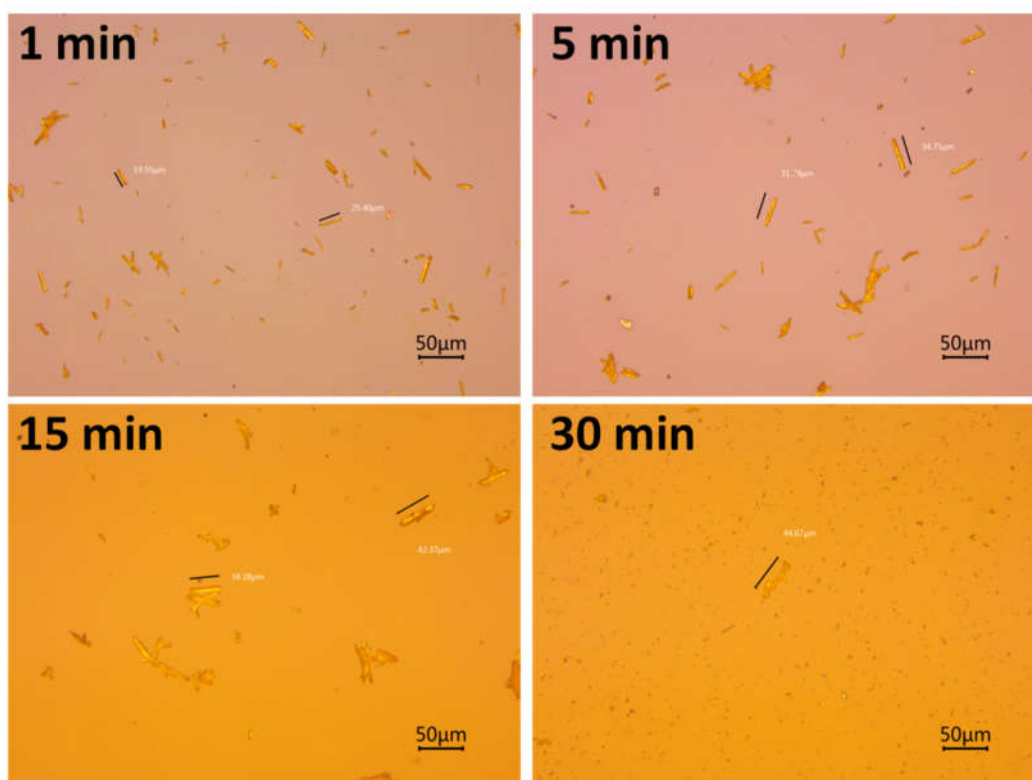

**Figure S2** Optical microscopy image of  $\text{PbI}_2$  microtubes synthesized at different time duration. The measurements were taken after the samples are dispersed on glass substrates.

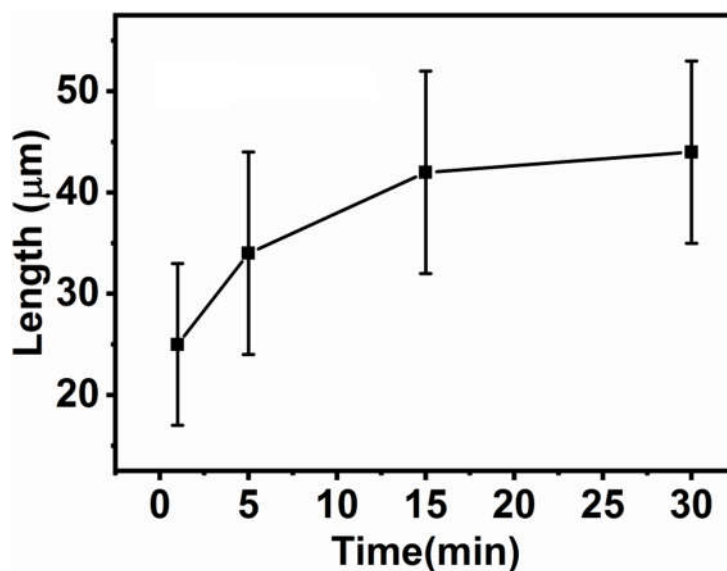

**Figure S3** Effect of growth time on the length of  $\text{PbI}_2$  microtubes.

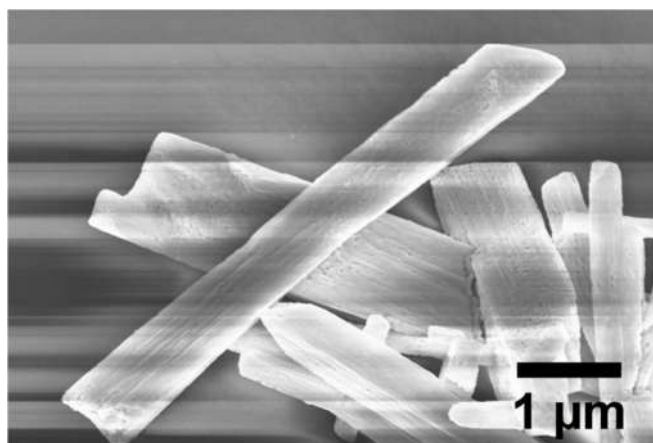

**Figure S4** FE-SEM image  $\text{PbI}_2$  microrods with faceted morphology.

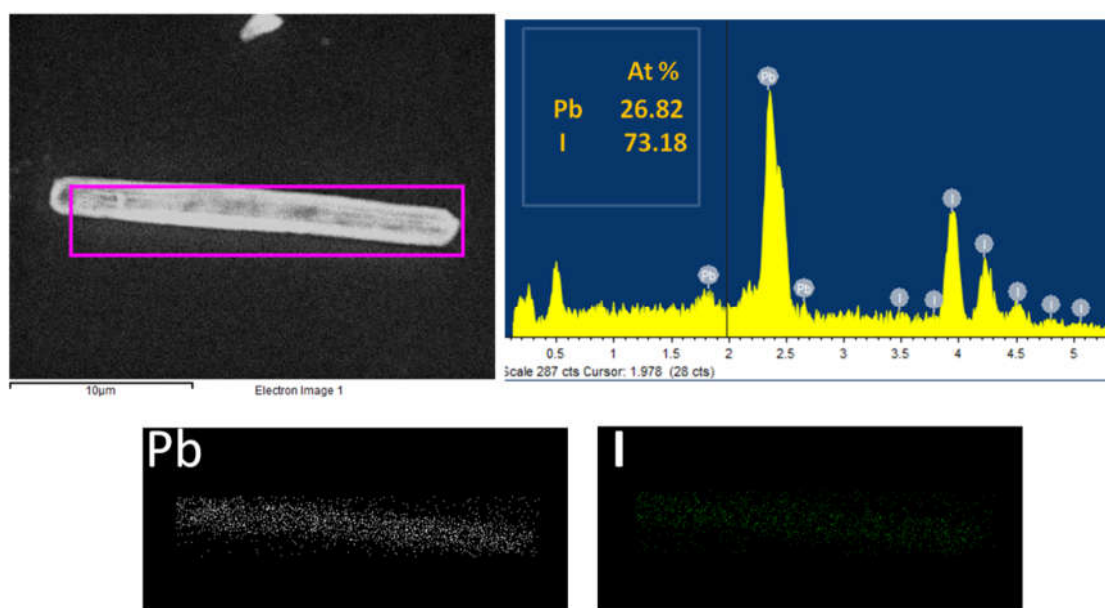

**Figure S5** Energy dispersive X-ray spectrum of  $\text{PbI}_2$  microrods. The samples were dispersed on  $\text{SiO}_2/\text{Si}$  substrates.

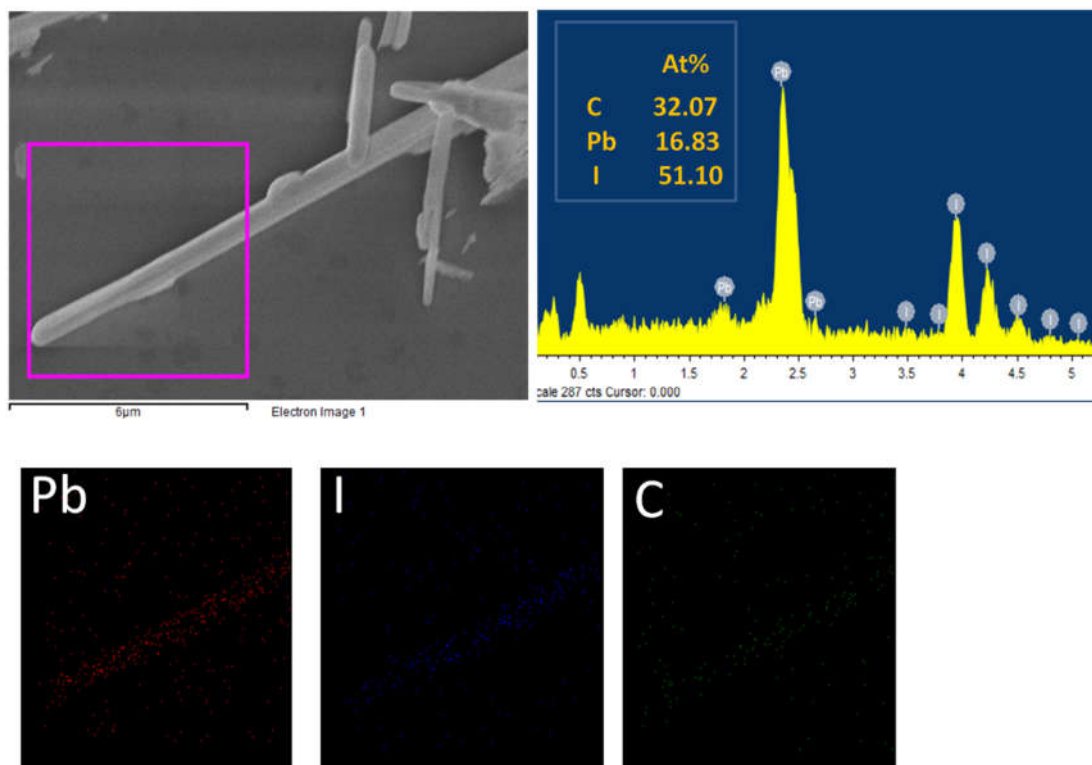

**Figure S6** Energy dispersive X-ray spectrum of MAPbI<sub>3</sub> microtubes. The samples were dispersed on SiO<sub>2</sub>/Si substrates.

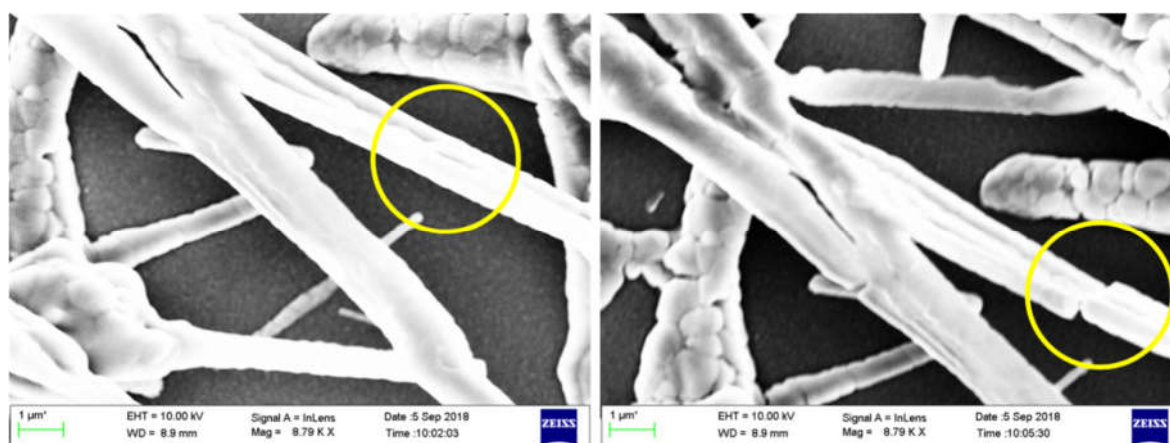

**Figure S7** FE-SEM image of MAPbI<sub>3</sub> nano/microtubes after exposure of electron beam for a long time. The breakings of tubes were occurred (as indicated in orange circle).

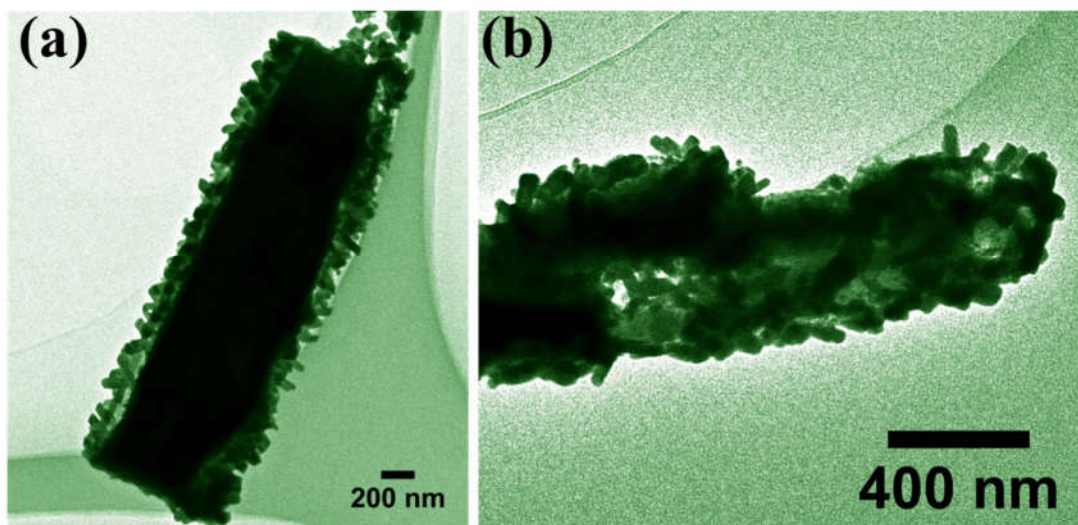

**Figure S8** HR-TEM image of  $\text{MAPbI}_3$  microtubes with protruded whisker-like nanorods. The diameter and length of the protruded nanorods were found to vary from 40 nm to 60 nm and the length was  $\sim 150$  nm.

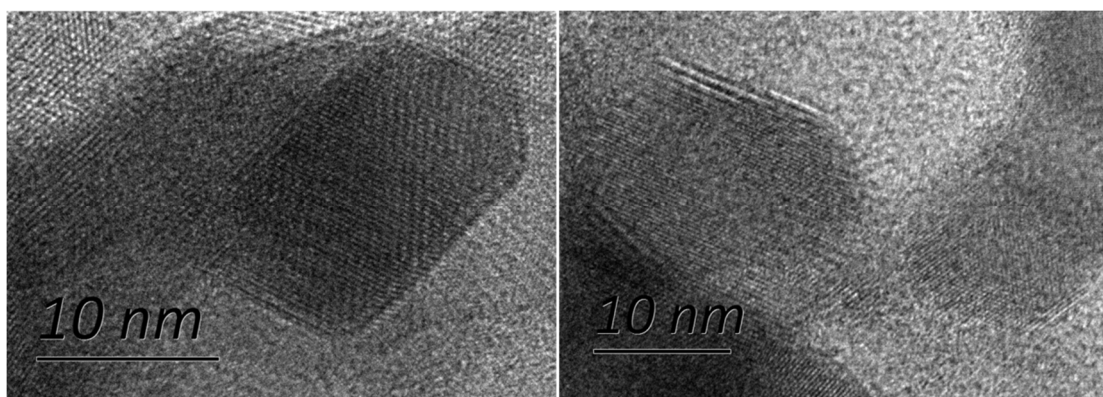

**Figure S9** HR-TEM image of  $\text{PbI}_2$  microtubes with well-distinguished twinned crystals.



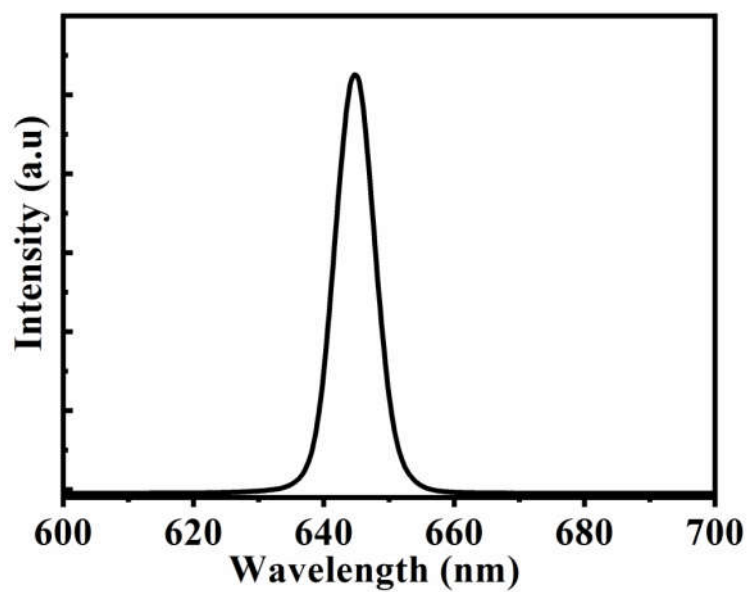

**Figure S10** PL spectra of MAPbI<sub>3</sub> microtubes at room temperature.

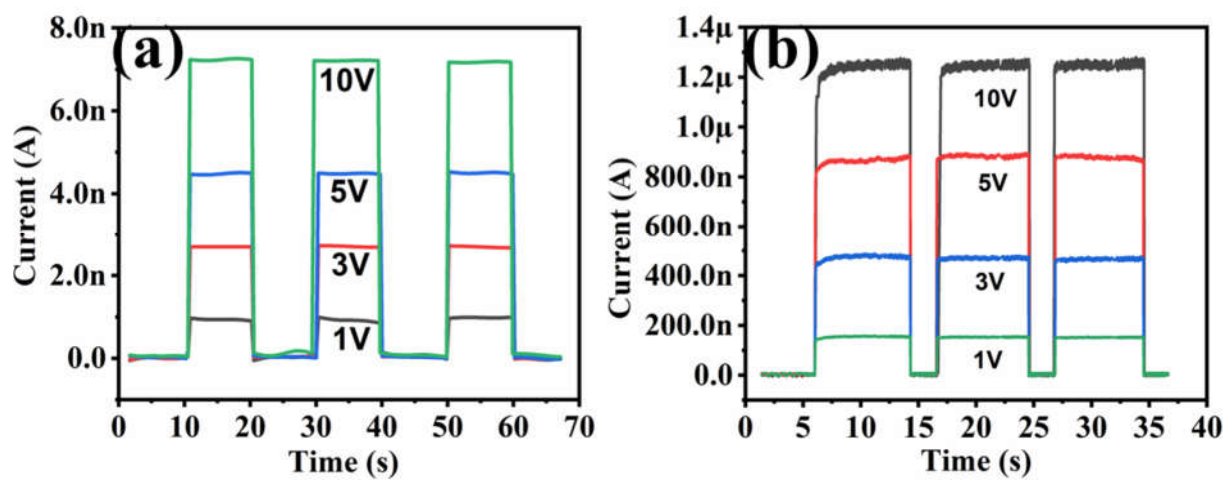

**Figure S11** I-t curves of the photodetectors based on PbI<sub>2</sub> microtubes (a) and MAPbI<sub>3</sub> microtubes (b) at different biases.
